# Supplementary material for: Localized surface plasmon resonances of size-selected large silver nanoclusters (n = 70–100) soft-landed on a C60 organic substrate
Source: Royal Society of Chemistry journal article supplement (doi:10.1039/d4cp01151a), 2024-01-01
Supplement: d4cp01151a1.pdf [file d4cp01151a1.pdf]

*Electronic Supplementary Information for*

**Localized Surface Plasmon Resonances of Size-Selected Large Silver Nanoclusters  
( $n = 70\sim 100$ ) Soft-Landed on a  $C_{60}$  Organic Substrate**

**Tomoya Inoue,<sup>a</sup> Kaito Mizoguchi,<sup>a</sup> Miwa Tokita,<sup>a</sup> Masahiro Shibuta,<sup>b,§</sup> Masato Nakaya,<sup>a,†</sup>  
Toyoaki Eguchi,<sup>a,‡</sup> and Atsushi Nakajima<sup>a,b,\*</sup>**

<sup>a</sup>*Department of Chemistry, Faculty of Science and Technology, Keio University, 3-14-1 Hiyoshi, Kohoku-ku, Yokohama 223-8522, Japan*

<sup>b</sup>*Keio Institute of Pure and Applied Sciences (KiPAS), Keio University, 3-14-1 Hiyoshi, Kohoku-ku, Yokohama 223-8522, Japan*

\*Address correspondence to A. Nakajima

Tel: +81-45-566-1712, Fax: +81-45-566-1697, E-mail: nakajima@chem.keio.ac.jp

<sup>§</sup>Present address: *Department of Physics and Electronics, Graduate School of Engineering, Osaka Metropolitan University, 1-1 Gakuen-cyo, Naka-ku, Sakai, Osaka 599-8531 Japan*

<sup>†</sup>Present address: *Department of Energy Science and Engineering, Nagoya University, Furo-cho, Chikusa-ku, Nagoya 464-8603, Japan*

<sup>‡</sup>Present address: *The Toyama Monozukuri Center, 3816-1 Kishi, Yamakita-machi, Ashigarakami-gun, Kanagawa, 258-0112, JAPAN*

**Contents**

|                                                                                                                       |    |
|-----------------------------------------------------------------------------------------------------------------------|----|
| <b>Figure S1.</b> STM image of soft-landed $Ag_n$ NCs on a $C_{60}$ substrate at $n = 3, 7, 13,$ and $55$ .           | S2 |
| <b>Figure S2.</b> UPS and XPS spectra for (a) $Ag_{100}/C_{60}$ and (b) Ag 3d of $Ag_{70}, Ag_{85},$ and $Ag_{100}$ . | S3 |
| <b>Reference</b>                                                                                                      | S3 |

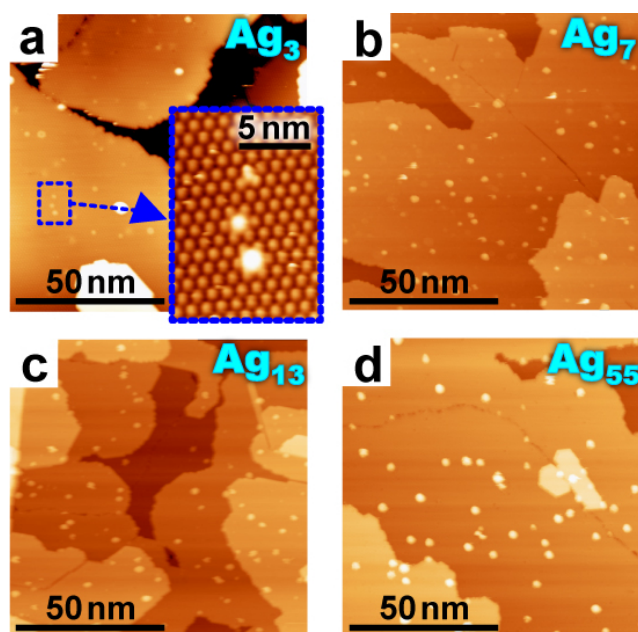

**Figure S1.** STM image of soft-landed Ag<sub>*n*</sub> NCs on a C<sub>60</sub> substrate (100 × 100 nm<sup>2</sup>) at a low coverage ( $\sim 4 \times 10^3$  dots/ $\mu\text{m}^2 \approx 7.3 \times 10^{-3}$  ML); (a)  $n=3$ , (b)  $n=7$ , (c)  $n=13$ , and (d)  $n=55$ . The tip bias voltage ( $V_t$ ) and tunneling current ( $I_t$ ) are  $V_t = -2.0$  V and  $I_t = 10$  pA, respectively. Inset in (a) is a high-resolution image of a rectangular region surrounded by dotted line in (a). Bright dots correspond to individual Ag<sub>*n*</sub> NCs, monodispersively immobilized on the C<sub>60</sub> surface,<sup>1</sup> similar to Ag<sub>75</sub> NCs on C<sub>60</sub> in Figure 1 in the main text.

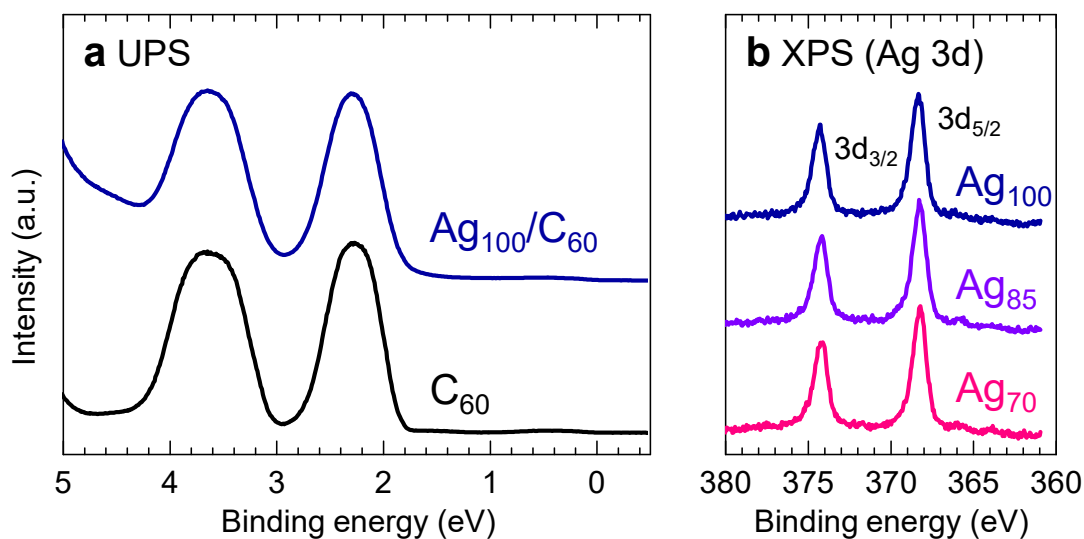

**Figure S2.** (a) Ultraviolet photoelectron spectrum for Ag<sub>100</sub> nanoclusters (NCs) on a C<sub>60</sub> substrate and (b) X-ray photoelectron spectra for Ag 3d of Ag<sub>70</sub>, Ag<sub>85</sub>, and Ag<sub>100</sub> NCs. In the UPS spectra, peaks assignable to the highest occupied molecular orbital (HOMO) and the second HOMO (HOMO-1) are observed at the binding energies (BEs) of 2.3 and 3.6 eV, respectively, which show no peak shift with the deposition of Ag<sub>100</sub> nanoclusters (NCs). Since they shift toward higher BEs with electron donation or toward lower BEs with electron acceptance,<sup>2</sup> the lack of shift indicates that Ag<sub>100</sub> NCs on C<sub>60</sub> are in a neutral state. In the XPS spectra for Ag 3d, although characterizing their charge states is hard due to intrinsic small chemical state dependence within the spectral resolutions, it does not seem contradictory to the zerovalent of Ag atoms in Ag<sub>n</sub> NCs, and no NC size-dependent behavior is observed.

## Reference

1. M. Nakaya, T. Iwasa, H. Tsunoyama, T. Eguchi, and A. Nakajima, *Adv. Funct. Mater.*, **2014**, *24*, 1202–1210 (2014).
2. T. Kamoshida, M. Shibuta, T. Ohta, T. Eguchi, and A. Nakajima, *J. Phys. Chem. C*, **2022**, *126*, 10889–10899.
